# Supplementary material
Source: Springer Nature journal article supplement (https://www.springermedizin.de/resource/supplementary/12885_2010_2874_MOESM2_ESM.pdf/9462200)

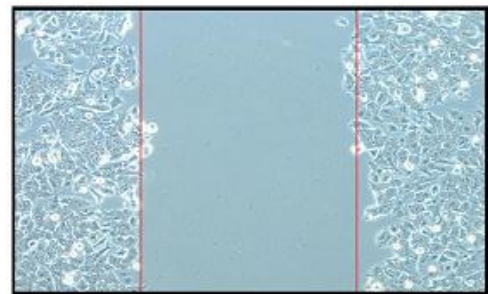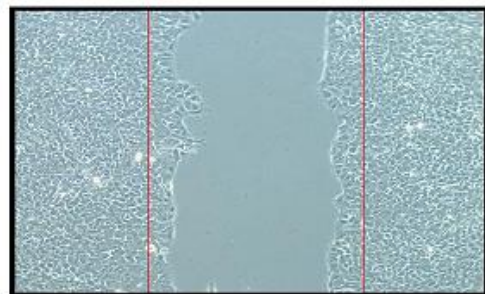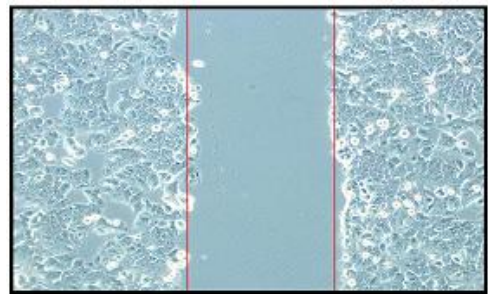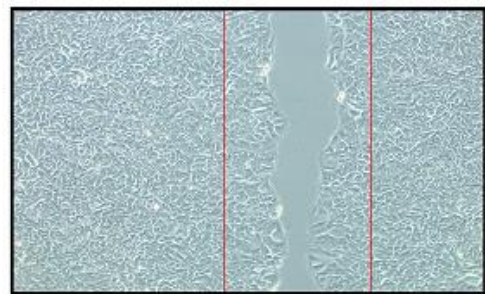

A

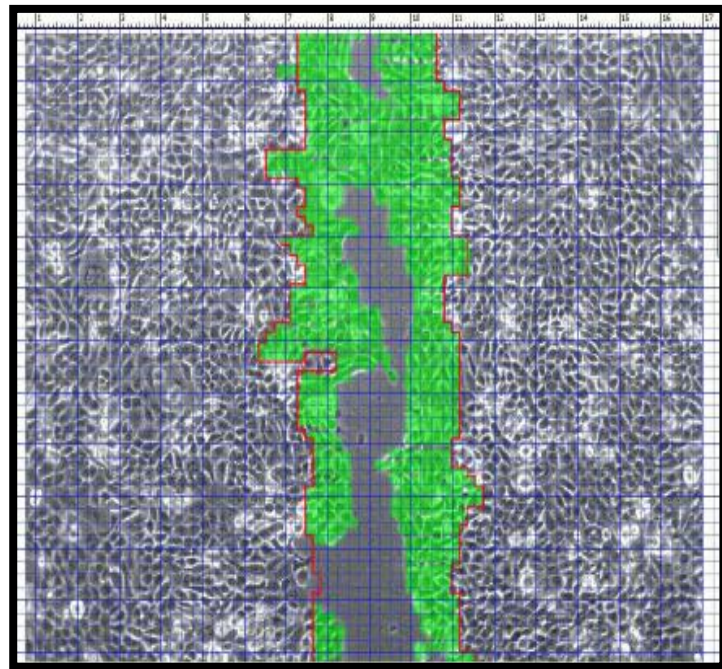

B

Supplement: MOESM2 [file 9462200]
